# Supplementary material for: Subtractive Proteomics Analysis Revealed Lipid A-4’phosphatase (lpxF) as a Potential Candidate for Epitope-based Vaccine Design Against Helicobacter pylori Infection
Source: Research Square preprint supplement (doi:10.21203/rs.3.rs-557276/v1), 2021-05-27
Supplement: Supplementary file 1 [file ccbe4493177d3f4fad2699e5.docx]

Supplementary Table S7. List of peptides used for virtual screening and the respective docking energies against TLR2 receptor.

| Peptide ID | Peptide Sequence | Binding energy (kcal/mol) |
| --- | --- | --- |
| PEP_01 | LPIFVGTVSLAMRDYRGLGE | -7.4 |
| PEP_02 | GLKGAFSTAHKDGARVGFAKRPCCNSWRGMP | -6.3 |
| PEP_03 | RPCCNSWRGMPSGHAGGAFS | -6.1 |
| PEP_04 | YYRYGWKPALP | -5.7 |
| PEP_05 | LLLWVYPLKSEPINEGAYI | -6 |
| PEP_06 | LWVYPLKSEPINEGAYILEE | -6.9 |
| PEP_07 | YKPKRWMLYPEISSDFKGSS | -4.2 |
| PEP_08 | FLSLLLW | -5.5 |
| PEP_09 | STAHKDG | -5.4 |
| PEP_10 | PLKSEPI | -5.2 |
| PEP_11 | AMRDYRG | -5.5 |
| PEP_12 | TAHKDG | -4.7 |
| PEP_13 | YYRYGW | -6.7 |
| PEP_14 | FTSRYKPKRWML | -5.8 |
| PEP_15 | SDFKGSSR | -5.2 |
| PEP_16 | GLFLSLLLWVYPL | -5.9 |
| PEP_17 | VLRFLPIFVGTV | -5.9 |
| PEP_18 | TQGVIYG | -5.7 |
| PEP_19 | AGFVYYR | -6.9 |
| PEP_20 | ALPVIALAIL | -4.6 |
| PEP_21 | RVVAGQH | -5.4 |
| PEP_22 | ILQVTIGSL | -6.1 |
| PEP_23 | FAYLFT | -5.5 |
| PEP_24 | LLLWVYP | -6.3 |
| PEP_25 | FKGSSRY | -5.1 |
| PEP_26 | VIALAIL | -5.7 |
| PEP_27 | PSGHAGG | -5.2 |
| PEP_28 | FSAAGFVYY | -4.6 |
| PEP_29 | FLSLLLWVY | -6.3 |
| PEP_30 | TVSLAMRDY | -5.3 |
| PEP_31 | FAYLFTSRY | -6.9 |
| PEP_32 | SLIAWGFAY | -6.5 |
| PEP_33 | TLVTQGVIY | -4.8 |
| PEP_34 | YKPKRWMLY | -5.9 |
| PEP_35 | AAGFVYYRY | -5.8 |
